# Supplementary material for: Shape-controlled Mn–Fe PBA derived micromotors for organic pollutant removal
Source: Royal Society of Chemistry journal article supplement (doi:10.1039/d2nj01022d), 2022-01-01
Supplement: d2nj01022d1.pdf [file d2nj01022d1.pdf]

## Supporting Information

### Shape Controllable Mn-Fe PBAs Derivatives Micromotors for Organic Pollutant Removal

*Jing Huang, Qi Shan, Yanan Fang, Ning Zhao, and Xiaomiao Feng\**

Key Laboratory for Organic Electronics and Information Displays & Institute of Advanced Materials (IAM), Jiangsu National Synergetic Innovation Center for Advanced Materials (SICAM), School of Materials Science & Engineering, Nanjing University of Posts and Telecommunications, 9 Wenyuan Road, Nanjing 210023, China

\* Corresponding author.

E-mail address: [iamxmfeng@njupt.edu.cn](mailto:iamxmfeng@njupt.edu.cn) (X. M. Feng)

**Video S1.** Autonomous motion of cubic and spherical Mn-Fe oxides micromotors in 5% H<sub>2</sub>O<sub>2</sub> at 450 °C.

**Video S2.** Directional motion of cubic and spherical Mn-Fe oxides micromotors in 3% H<sub>2</sub>O<sub>2</sub> under applied magnetic field.

**Video S3.** Autonomous motion of cubic Mn-Fe oxides micromotors in 0.3%, 1% and 5% H<sub>2</sub>O<sub>2</sub> obtained at 450 °C.

**Video S4.** Autonomous motion of spherical Mn-Fe oxides micromotors in 0.7%, 5% and 7% H<sub>2</sub>O<sub>2</sub> obtained at 450 °C.

**Video S5.** Autonomous motion of cubic Mn-Fe oxides micromotors in 5% H<sub>2</sub>O<sub>2</sub> obtained at 450 °C, 550 °C and 650 °C.

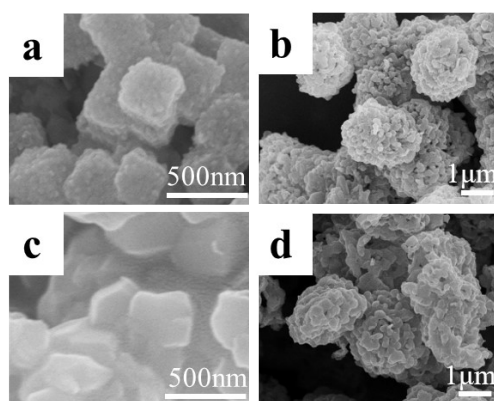

Figure S1. SEM images of derived micromotors at 550 °C (a, b), 650 °C (c, d): microcube (a, c), microsphere (b, d).

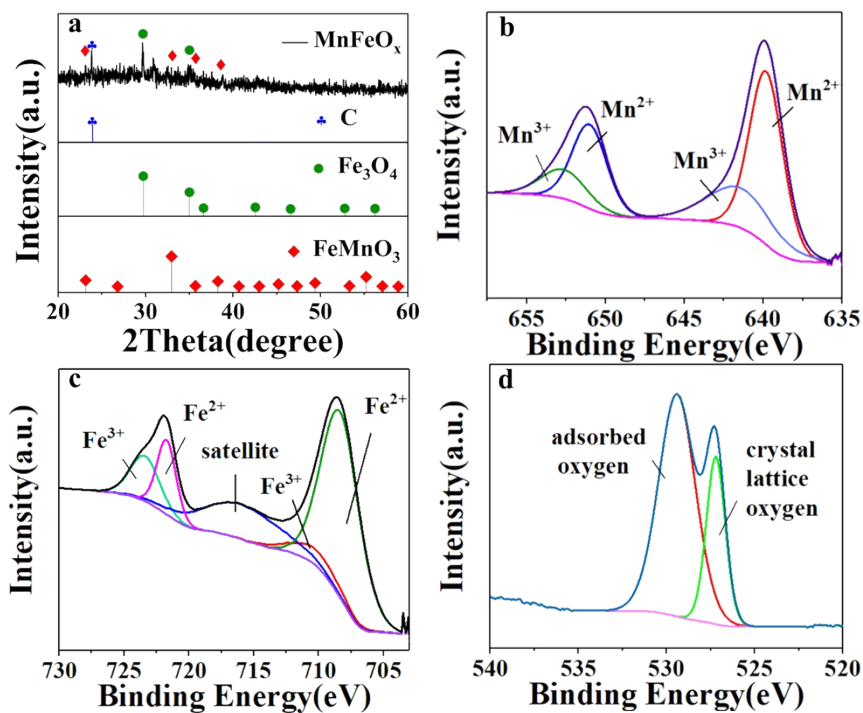

Figure S2. XRD pattern (a), XPS spectra of Mn 2p (b), Fe 2p (c) and O 1s (d) of spherical Mn-Fe oxides.

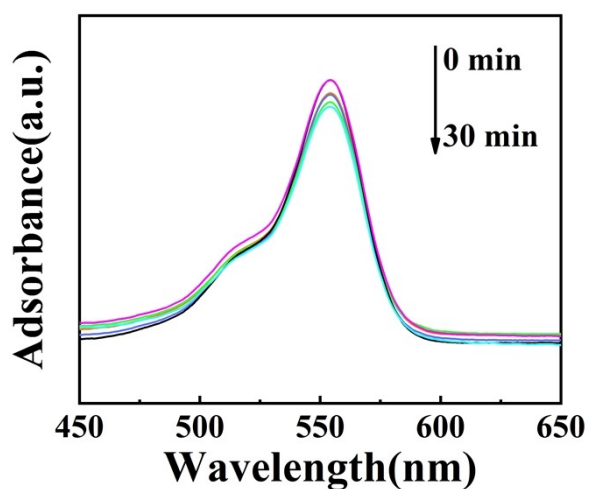

Figure S3 The UV-vis absorption spectra of RhB ( $2 \text{ mg} \cdot \text{mL}^{-1}$ ) in 4%  $\text{H}_2\text{O}_2$  solution without cubic Mn-Fe oxides micromotors from 0 min to 30 min.

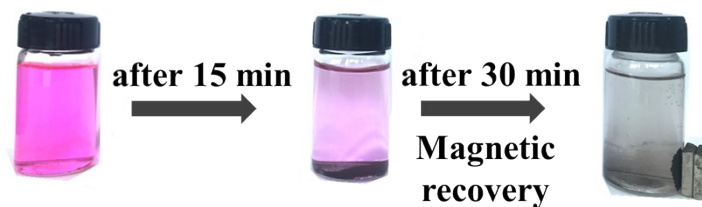

Figure S4 Degradation of RhB and recovery of micromotors by magnetic field.
